# Supplementary material for: Durable polymericN-halamine functionalized stainless steel surface for improved antibacterial and anti-biofilm activity
Source: Royal Society of Chemistry journal article supplement (doi:10.1039/d0ma00828a), 2021-01-01
Supplement: d0ma00828a1.pdf [file d0ma00828a1.pdf]

## Supplementary Information

### **Durable Polymeric N-halamine Functionalized Stainless Steel Surface for Improved Antibacterial and Anti-biofilm Activity**

Rajani Kant Rai<sup>a\*</sup>, Hemalatha Kanniyappan<sup>b</sup>, Vignseh Mutthuvijayan<sup>b</sup>, V. Kesavan<sup>a</sup>,  
Athipettah Jayakrishnan<sup>ac\*</sup>

<sup>a</sup>Chemical Biology Laboratory, Bhupat and Jyothi Mehta School of Biosciences, Indian Institute of Technology Madras, Chennai 600 036, Tamil Nadu, India.

<sup>b</sup>Tissue Engineering Laboratory, Bhupat and Jyothi Mehta School of Biosciences, Indian Institute of Technology Madras, Chennai 600 036, Tamil Nadu, India.

<sup>a, c</sup>Raja Ramanna Fellow, Rajiv Gandhi Centre for Biotechnology, Jagathy, Trivandrum 695 014, Kerala, India.

\*Corresponding authors

E-mail: Rajani Kant Rai: [rk.120988@gmail.com](mailto:rk.120988@gmail.com)

A. Jayakrishnan: [jayakrishnana@rgcb.res.in](mailto:jayakrishnana@rgcb.res.in)

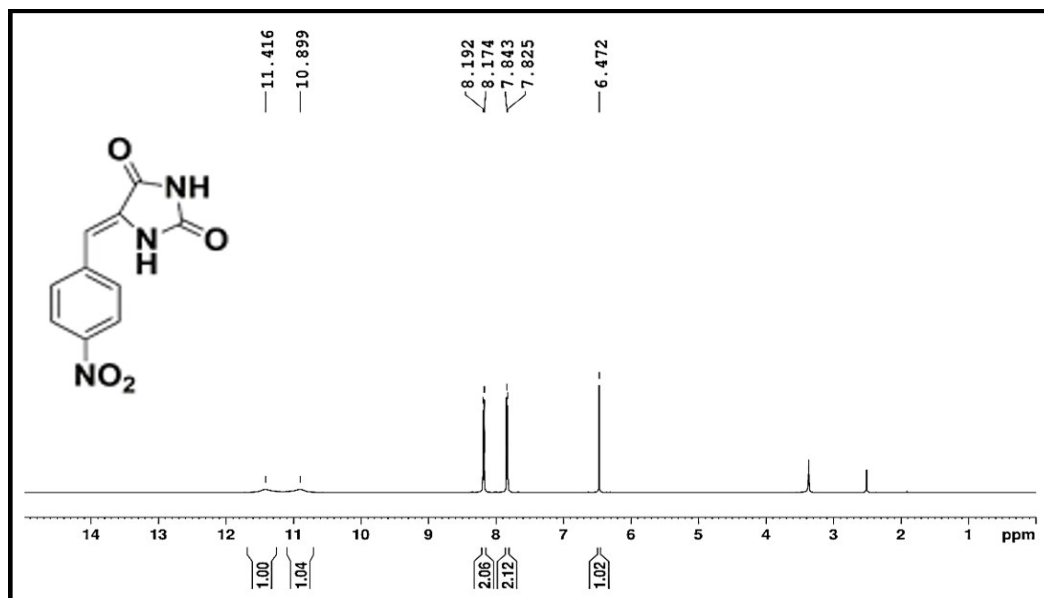

Figure S1 <sup>1</sup>H NMR of NBID

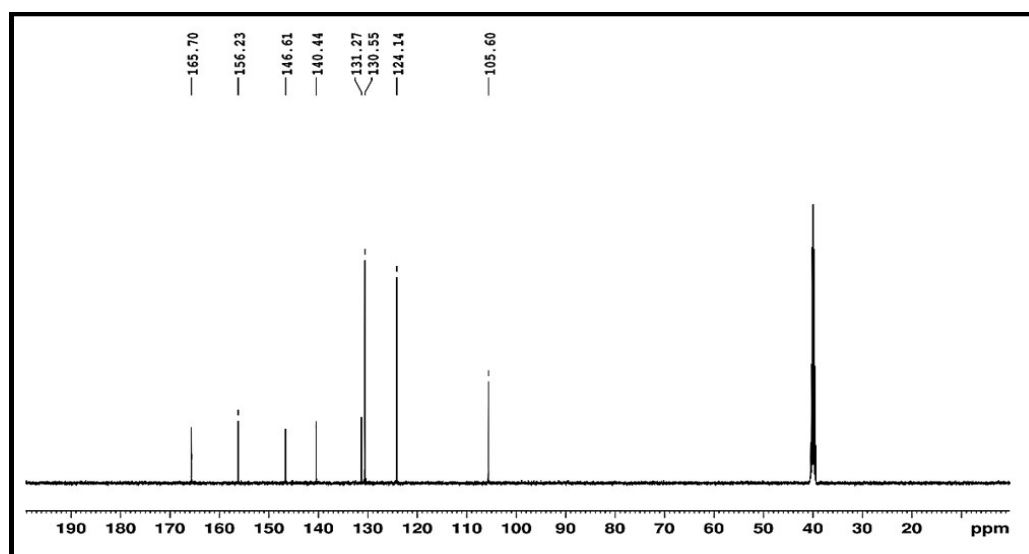

Figure S2. <sup>13</sup>C NMR of NBID

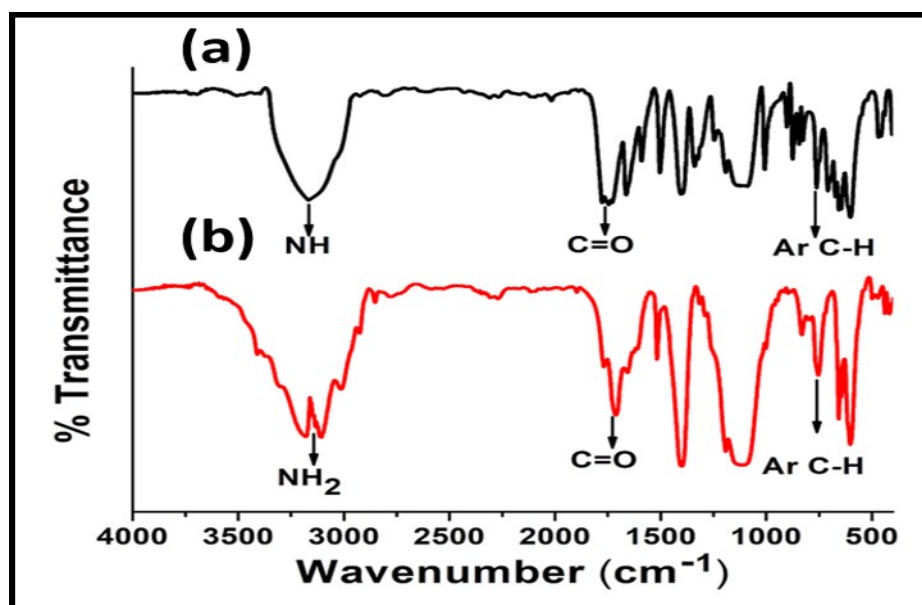

Figure S3. FTIR spectrum of NBID (a) and ABID (b)

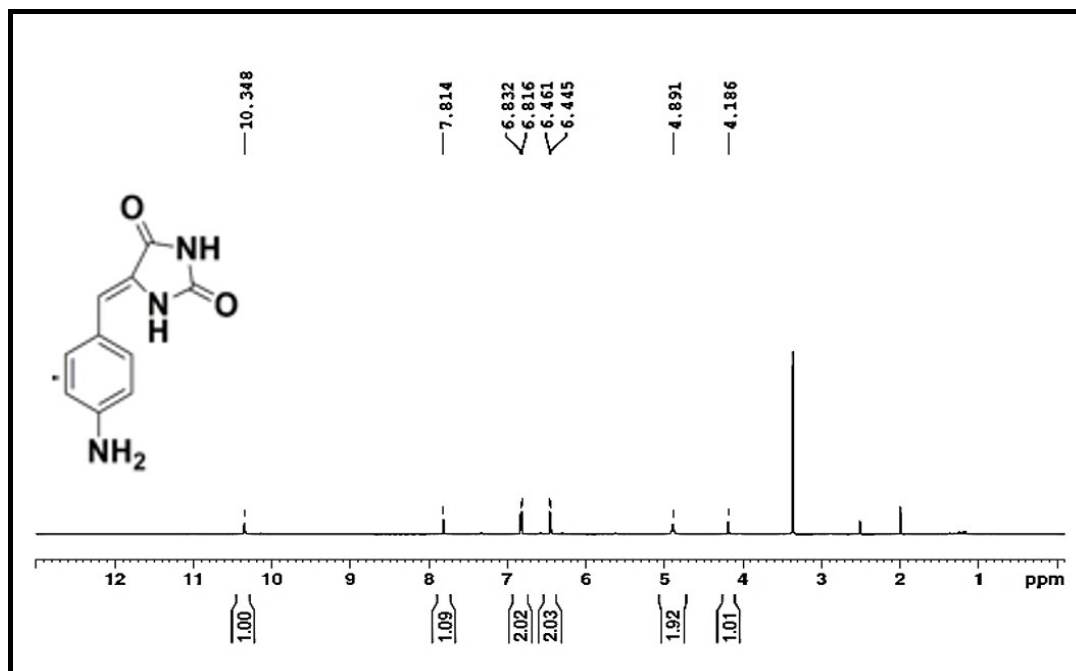

Figure S4. <sup>1</sup>H NMR of ABID

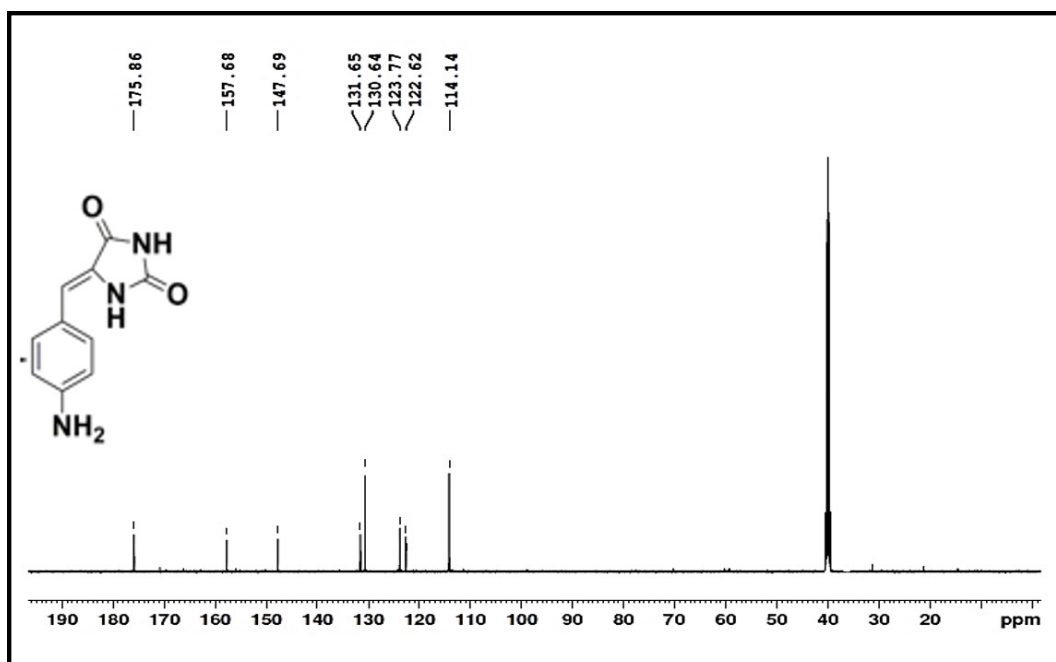

Figure S5. <sup>13</sup>C NMR of ABID

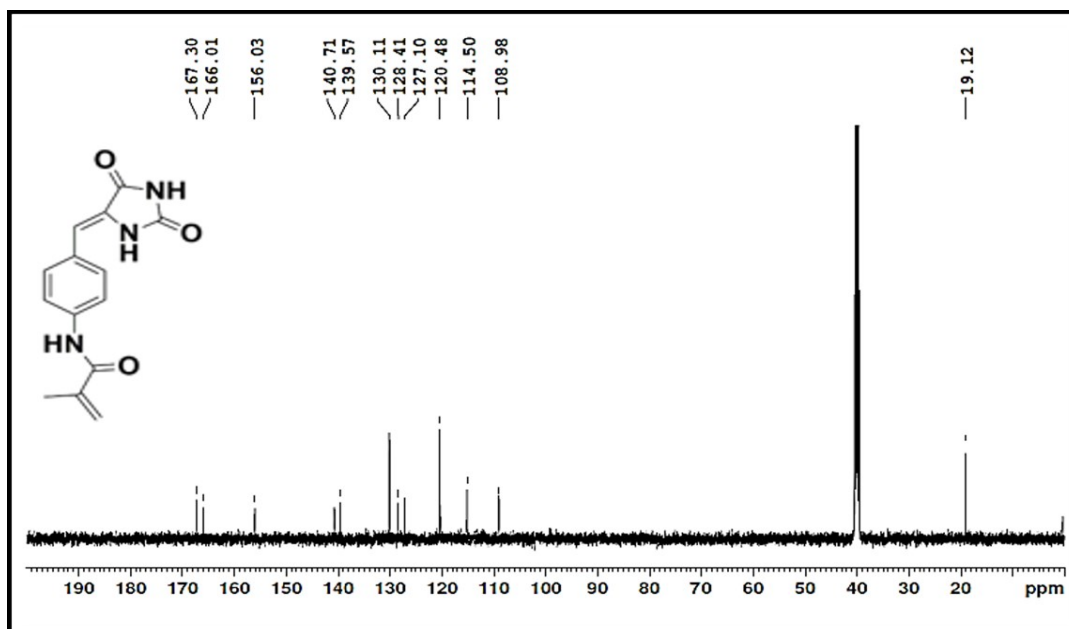

Figure S6. <sup>13</sup>C NMR of DMPM

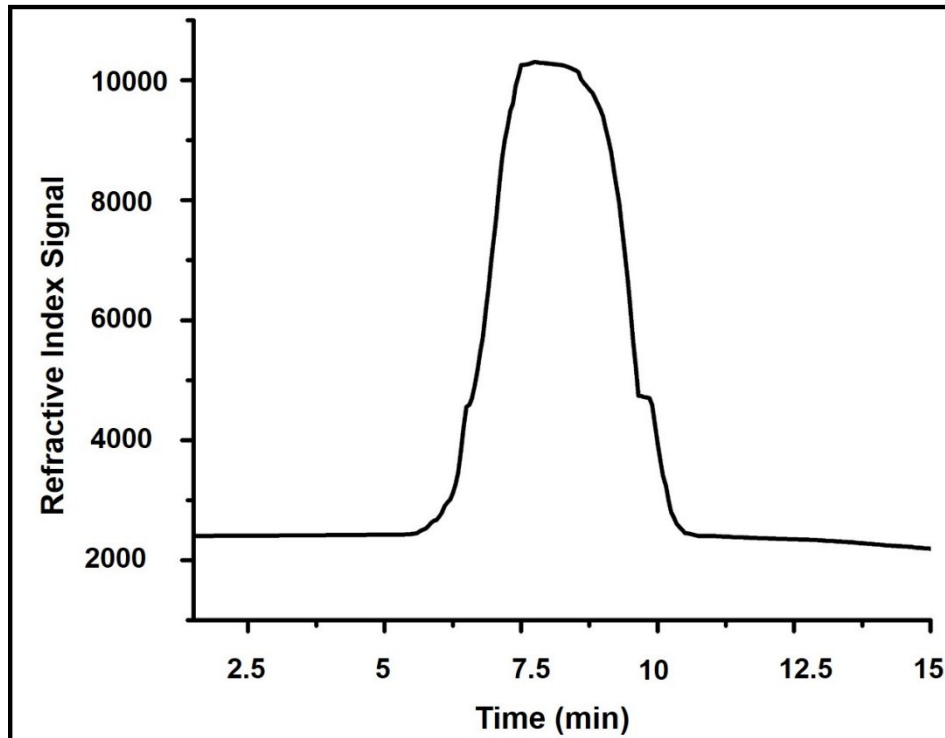

**Figure S7:** Gel permeation chromatogram of poly(DMPM-co-MPTS)

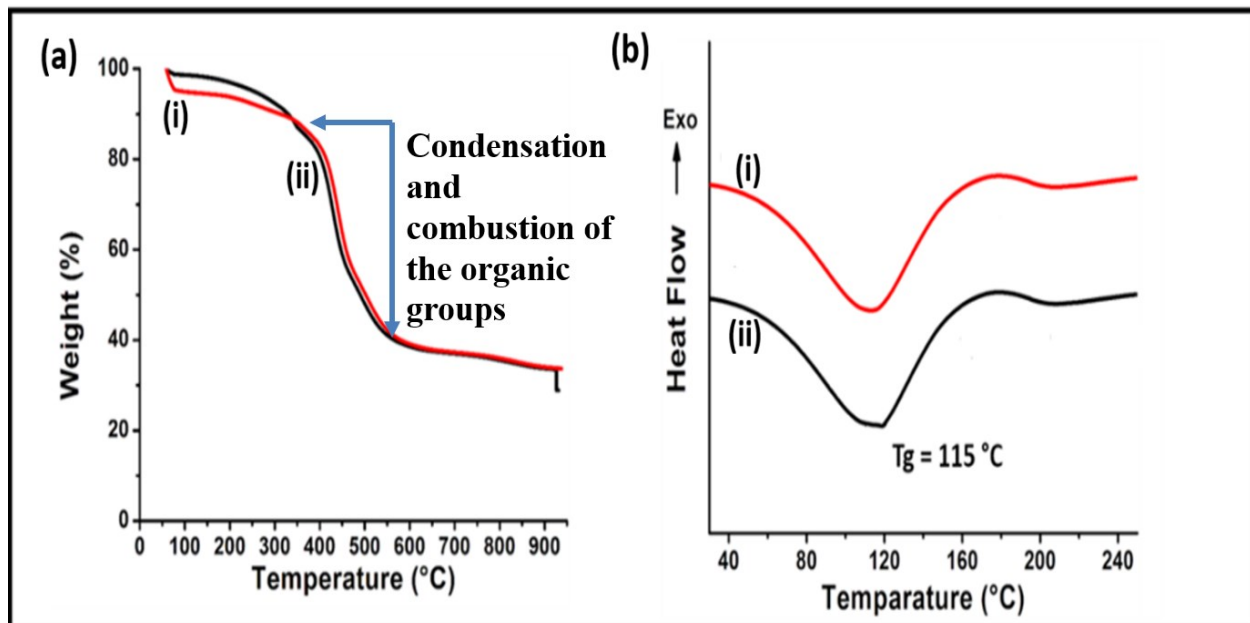

**Figure S8.** Thermal analysis of polymer. (a) TGA of pristine poly(MPTS) (i) and (ii) and (b) DSC of poly(MPTS) (i) and poly(DMPM-co-MPTS) (ii).

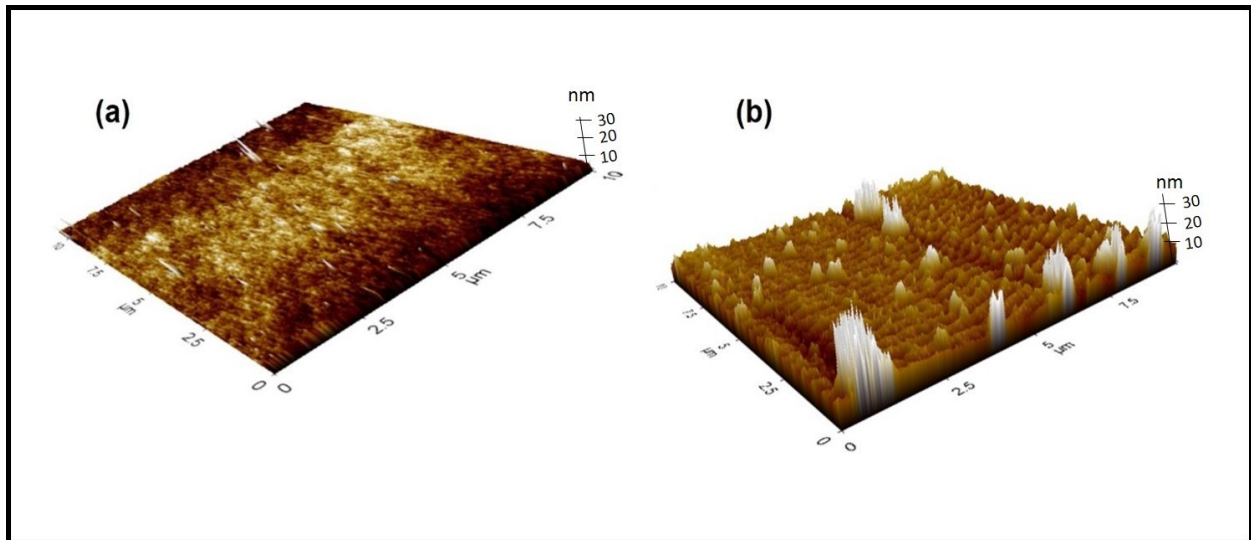

**Figure S9.** Atomic force micrograph of stainless steel surface, control (a) and modified surface (b)

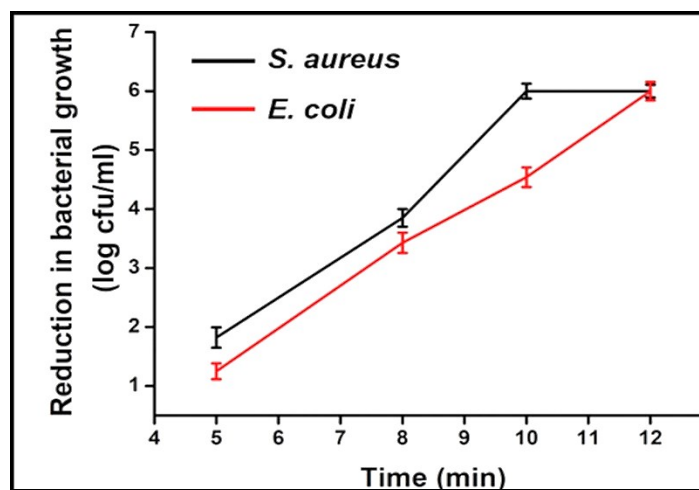

**Figure 10.** Antibacterial activity of SS surface modified with chlorinated polymer containing 15 mol% of hydantoin monomer.

**Table S1. Elemental analysis of polymers using CHNSO analyzer and iodometric titration**

| <b>Sample</b>            | <b>Mole % of DMPM in Polymers</b> | <b>C (%)<sup>a</sup></b> | <b>H (%)<sup>a</sup></b> | <b>N (%)<sup>a</sup></b> | <b>Cl (%)<sup>b</sup></b> |
|--------------------------|-----------------------------------|--------------------------|--------------------------|--------------------------|---------------------------|
| PMPTS                    | 0%                                | 56.64                    | 8.12                     | 0                        | 0                         |
| P(DMPM- <i>co</i> -MPTS) | 5%                                | 57.61                    | 6.98                     | 0.96                     | 0.95 ± 0.03               |
|                          | 10%                               | 55.87                    | 7.35                     | 1.7                      | 1.50 ± 0.04               |

<sup>a</sup>Obtained from CHNSO analyzer, <sup>b</sup>Obtained from iodometric titration
